# Supplementary material for: Direct determination of cadmium in geological samples by slurry sampling electrothermal atomic absorption spectrometry
Source: Royal Society of Chemistry journal article supplement (doi:10.1039/c5ay01719j), 2015-01-01
Supplement: c5ay01719j1.pdf [file c5ay01719j1.pdf]

## Technical Note

# Direct determination of trace cadmium in soils, sediments and rocks by slurry sampling electrothermal atomic absorption spectrometry

Hao Cui <sup>a</sup>, Wei Guo <sup>\*, a</sup>, Mengting Cheng <sup>a</sup>, Ping Zhang <sup>b</sup>, Lanlan Jin <sup>a</sup>, Qinghai

Guo <sup>a</sup>, Shenghong Hu <sup>\*\*, a</sup>

<sup>a</sup> *State Key Laboratory of Biogeology and Environmental Geology, China University of Geosciences, Wuhan, 430074, P. R. China*

<sup>b</sup> *Beijing CKC, PerkinElmer, Inc. 100015, China*

\*Corresponding Author. Tel and Fax: +86-27-67883495

Email address: [Wei.Guo@cug.edu.cn](mailto:Wei.Guo@cug.edu.cn) (Wei Guo); [Shhu@cug.edu.cn](mailto:Shhu@cug.edu.cn) (Shenghong Hu).

## Electronic supplementary information

1. **Fig. 1S.** Real-time monitoring the process of slurry sampling ETAAS by a TubeView™ color furnace camera: (a) slurries sampling, (b) slurries drying, (c) slurries ashing, and (d) Cd atomization.
2. **Fig. 2S.** The formation of the homogenous and stable slurries under different sonication duration: (a) 0 min, (a) 5 min, (a) 15 min; and (a) 20 min.
3. **Table 1S.** The Cd levels in 86 solid geological SRMs by the proposed method,  $\mu\text{g g}^{-1}$ .

4. **Table S2.** Closed pressurized digestion with a mixture of HF + HNO<sub>3</sub>.

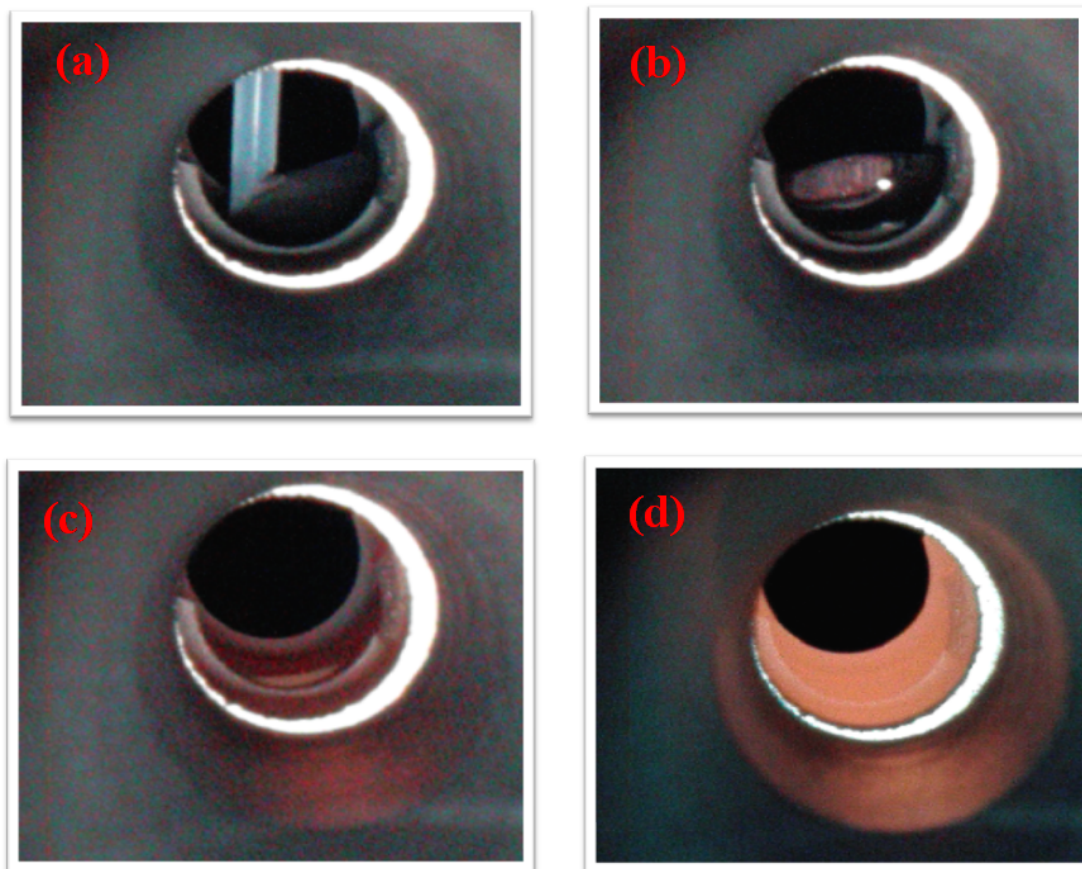

**Fig. 1S.** Real-time monitoring the process of slurry sampling ETAAS by a TubeView™ color furnace camera: (a) slurries sampling, (b) slurries drying, (c) slurries ashing, and (d) Cd atomization.

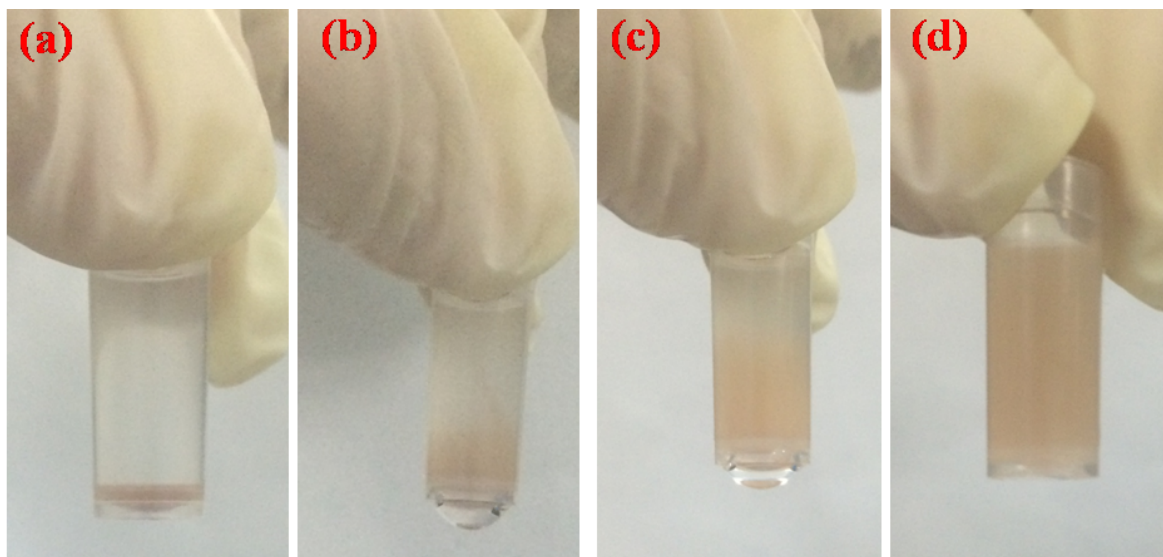

**Fig. 2S.** The formation process of the homogenous and stable slurries under different sonication duration: (a) 0 min, (b) 5 min, (c) 15 min; and (d) 20 min.

**Table 1S.**

The Cd levels in 86 solid geological SRMs by the proposed method,  $\mu\text{g g}^{-1}$ .

| Environmental SRMs | Description                                    | Certified values  | Determined values (N=10) |
|--------------------|------------------------------------------------|-------------------|--------------------------|
|                    | GSD-1 Granite area sediment                    | $0.088 \pm 0.014$ | $0.080 \pm 0.010$        |
|                    | GSD-3 Porphyry copper deposit sediment         | $0.100 \pm 0.020$ | $0.100 \pm 0.030$        |
|                    | GSD-4 Limestone ore district sediment          | $0.190 \pm 0.020$ | $0.210 \pm 0.011$        |
|                    | GSD-5 Skarn mining area sediment               | $0.820 \pm 0.050$ | $0.830 \pm 0.020$        |
|                    | GSD-6 Porphyry copper deposit sediment         | $0.430 \pm 0.030$ | $0.480 \pm 0.030$        |
|                    | GSD-8 Acidic volcano rock area sediment        | $0.081 \pm 0.012$ | $0.070 \pm 0.030$        |
|                    | GSD-9 Yangtze River sediment                   | $0.260 \pm 0.040$ | $0.220 \pm 0.026$        |
|                    | GSD-10 Carbonate area sediment                 | $1.12 \pm 0.08$   | $1.00 \pm 0.02$          |
|                    | GSD-11 Multi metal mining area sediment        | $2.30 \pm 0.20$   | $2.20 \pm 0.060$         |
|                    | GSD-13 Quartz sand area sediment               | $0.045 \pm 0.015$ | $0.040 \pm 0.012$        |
|                    | GSD-14 Sediment                                | $0.200 \pm 0.030$ | $0.193 \pm 0.040$        |
|                    | GSD-15 Multi metal mining area sediment        | $0.340 \pm 0.020$ | $0.320 \pm 0.090$        |
| Sediment (IGGE)    | GSD-16 Metamorphic rock area sediment          | $0.093 \pm 0.090$ | $0.096 \pm 0.001$        |
|                    | GSD-18 Granite area sediment                   | $0.095 \pm 0.010$ | $0.100 \pm 0.009$        |
|                    | GSD-19 Copper nickel mine sediment             | $0.120 \pm 0.010$ | $0.110 \pm 0.010$        |
|                    | GSD-20 Acidic volcano rock area sediment       | $0.220 \pm 0.100$ | $0.240 \pm 0.040$        |
|                    | GSD-21 Copper ore district sediment            | $0.760 \pm 0.030$ | $0.750 \pm 0.040$        |
|                    | GSD-22 Multi metal mining area sediment        | $0.165 \pm 0.010$ | $0.168 \pm 0.013$        |
|                    | GSD-1a Granite area sediment                   | $0.110 \pm 0.030$ | $0.100 \pm 0.040$        |
|                    | GSD-2a Granite area sediment                   | $0.108 \pm 0.090$ | $0.097 \pm 0.011$        |
|                    | GSD-3a Copper nickel mine sediment             | $0.500 \pm 0.060$ | $0.450 \pm 0.010$        |
|                    | GSD-4a Limestone area sediment                 | $0.900 \pm 0.050$ | $1.00 \pm 0.062$         |
|                    | GSD-5a Skarn mining area sediment              | $1.37 \pm 0.10$   | $1.45 \pm 0.04$          |
|                    | GSD-7a Lead zinc mine sediment                 | $5.60 \pm 0.60$   | $5.40 \pm 0.100$         |
|                    | GSD-8a Acidic volcano rock area sediment       | $0.160 \pm 0.010$ | $0.150 \pm 0.011$        |
| Soil (IGGE)        | GSS-1 Lead zinc mine in dark brown forest soil | $4.30 \pm 0.40$   | $4.00 \pm 0.08$          |

**Analytical Methods****Hao Cui et al.**

|             |          |                                 |                |               |
|-------------|----------|---------------------------------|----------------|---------------|
|             | GSS-2    | Chestnut soil                   | 0.071 ± 0.014  | 0.070 ± 0.009 |
|             | GSS-3    | Yellow brown soil               | 0.060 ± 0.009  | 0.055 ± 0.016 |
|             | GSS-4    | Limestone differentiation soil  | 0.350 ± 0.060  | 0.330 ± 0.050 |
|             | GSS-6    | Multi metal mine in yellow soil | 0.130 ± 0.030  | 0.150 ± 0.010 |
|             | GSS-7    | Basalt Latosol soil             | 0.080 ± 0.020  | 0.080 ± 0.030 |
|             | GSS-8    | Loess soil                      | 0.130 ± 0.020  | 0.130 ± 0.020 |
|             | GSS-9    | Soil                            | 0.100 ± 0.020  | 0.086 ± 0.012 |
|             | GSS-10   | Farming soil                    | 0.105 ± 0.013  | 0.088 ± 0.010 |
|             | GSS-11   | Soil                            | 0.125 ± 0.012  | 0.126 ± 0.010 |
|             | GSS-12   | Soil                            | 0.150 ± 0.020  | 0.142 ± 0.010 |
|             | GSS-13   | Soil                            | 0.130 ± 0.100  | 0.134 ± 0.030 |
|             | GSS-15   | Soil                            | 0.210 ± 0.020  | 0.216 ± 0.060 |
|             | GSS-16   | Soil                            | 0.250 ± 0.020  | 0.218 ± 0.013 |
|             | GSS-17   | Sandy soil                      | 0.058 ± 0.011  | 0.060 ± 0.014 |
|             | GSS-18   | Saline-alkali soil              | 0.150 ± 0.010  | 0.144 ± 0.013 |
|             | GSS-19   | Brown desert soil               | 0.108 ± 0.009  | 0.120 ± 0.040 |
|             | GSS-20   | Saline-alkali soil              | 0.108 ± 0.011  | 0.093 ± 0.020 |
|             | GSS-21   | Sierozem soil                   | 0.139 ± 0.080  | 0.150 ± 0.030 |
|             | GSS-22   | The Yellow Sea tidal flat soil  | 0.065 ± 0.012  | 0.061 ± 0.020 |
|             | GSS-23   | The East China Sea soil         | 0.150 ± 0.020  | 0.130 ± 0.030 |
|             | GSS-24   | Tidal flat soil                 | 0.106 ± 0.007  | 0.100 ± 0.020 |
|             | GSS-25   | Soil                            | 0.175 ± 0.010  | 0.160 ± 0.030 |
|             | GSS-26   | Huai River soil                 | 0.140 ± 0.010  | 0.130 ± 0.013 |
|             | GSS-27   | Yangtze River soil              | 0.590 ± 0.040  | 0.550 ± 0.040 |
|             | GBW03103 | The composition of clay         | / <sup>a</sup> | 0.108 ± 0.009 |
| Rock (IGGE) | GSR-2    | Andesite                        | 0.061 ± 0.014  | 0.052 ± 0.020 |
|             | GSR-3    | Basalt                          | 0.067 ± 0.016  | 0.060 ± 0.015 |
|             | GSR-4    | Quartz sandstone                | 0.060 ± 0.016  | 0.050 ± 0.020 |
|             | GSR-5    | Shale                           | 0.033 ± 0.012  | 0.032 ± 0.010 |
|             | GSR-6    | Argillaceous limestone          | 0.070 ± 0.020  | 0.056 ± 0.017 |
|             | GSR-21   | Limestone                       | 0.760 ± 0.030  | 0.672 ± 0.060 |

**Analytical Methods****Hao Cui et al.**

|             |          |                   |                    |               |
|-------------|----------|-------------------|--------------------|---------------|
|             | GBW07702 | Silicate          | 0.052 ± 0.005      | 0.054 ± 0.020 |
|             | GBW07703 | Silicate          | 0.100 ± 0.010      | 0.093 ± 0.030 |
|             | GBW07704 | Silicate          | 0.200 ± 0.010      | 0.220 ± 0.010 |
|             | GBW07705 | Silicate          | 0.500 ± 0.020      | 0.570 ± 0.010 |
|             | GBW07706 | Silicate          | 1.00 ± 0.100       | 1.00 ± 0.020  |
|             | GBW07712 | Limestone         | 0.023 <sup>b</sup> | 0.020 ± 0.008 |
|             | GBW07713 | Limestone         | 0.053 ± 0.010      | 0.048 ± 0.010 |
|             | GBW07714 | Limestone         | 0.100 ± 0.020      | 0.100 ± 0.010 |
|             | GBW07715 | Limestone         | 0.200 ± 0.030      | 0.220 ± 0.020 |
|             | GBW07716 | Limestone         | 0.500 ± 0.100      | 0.500 ± 0.010 |
|             | GBW07102 | Ultrabasic rocks  | 0.034 <sup>b</sup> | 0.024 ± 0.008 |
|             | GBW07109 | Nepheline syenite | 0.070 ± 0.020      | 0.070 ± 0.020 |
|             | GBW07111 | Granodiorite      | 0.080 ± 0.030      | 0.081 ± 0.020 |
|             | GBW07112 | Gray rock         | 0.090 ± 0.040      | 0.115 ± 0.010 |
|             | GBW07113 | Gabbro            | 0.140 ± 0.030      | 0.190 ± 0.100 |
|             | GBW07114 | Dolomite          | 0.070 ± 0.030      | 0.072 ± 0.030 |
|             | GBW07122 | Long gray rock    | 0.140 <sup>b</sup> | 0.130 ± 0.010 |
|             | GBW07123 | Diabase           | 0.390 ± 0.080      | 0.420 ± 0.020 |
|             | GUI-1    | Limestone         | / <sup>a</sup>     | 0.056 ± 0.005 |
|             | GUI-2    | Limestone         | / <sup>a</sup>     | 0.176 ± 0.012 |
|             | DIAN-1   | Limestone         | / <sup>a</sup>     | 0.134 ± 0.009 |
|             | DIAN-2   | Limestone         | / <sup>a</sup>     | 0.335 ± 0.005 |
|             | DIAN-3   | Limestone         | / <sup>a</sup>     | 0.244 ± 0.004 |
|             | GBW07101 | Ultra-basic rocks | 0.024 <sup>b</sup> | 0.044 ± 0.002 |
|             | AGV-2    | Andesite          | 0.069 <sup>b</sup> | 0.070 ± 0.003 |
|             | BHVO-2   | Basalt            | 0.060 <sup>b</sup> | 0.120 ± 0.012 |
| Rock (USGS) | SBC-1    | Shale             | 0.400 <sup>b</sup> | 0.400 ± 0.003 |
|             | SGR-1b   | Oil shale         | 0.900 <sup>b</sup> | 0.900 ± 0.040 |
|             | BCR-2    | Basalt            | 0.130 <sup>b</sup> | 0.155 ± 0.013 |

<sup>a</sup> No reported value;<sup>b</sup> Reference value by IGGE and USGS.

**Table S2.** Closed pressurized digestion with a mixture of HF + HNO<sub>3</sub>

| Step | Description                                                                                                                                                       |
|------|-------------------------------------------------------------------------------------------------------------------------------------------------------------------|
| 1    | 50 mg sample powder (< 200 mesh) was weighed into a Teflon bomb, moistened with a few drops of ultrapure water.                                                   |
| 2    | 1.0 mL HNO <sub>3</sub> +1.0 ml HF were added. The sealed bomb was heated at 190 °C in oven for > 48 h.                                                           |
| 3    | Open the bomb and evaporate the solution at ~120 °C to dryness. This was followed by adding 1 ml HNO <sub>3</sub> and evaporating to the second round of dryness. |
| 4    | The resultant salt was re-dissolved by adding ~3 ml of 30% HNO <sub>3</sub> and resealed and heated in the bomb at 190 °C for >12 h.                              |
| 5    | The final solution was diluted to ~100 g with mixture of 2% HNO <sub>3</sub> for ICP-MS analysis.                                                                 |
